# Supplementary material
Source: Springer Nature journal article supplement (https://www.springermedizin.de/resource/supplementary/12885_2012_3031_MOESM3_ESM.pdf/9463522)
Supplement: MOESM3 [file 9463522]

**All patients**

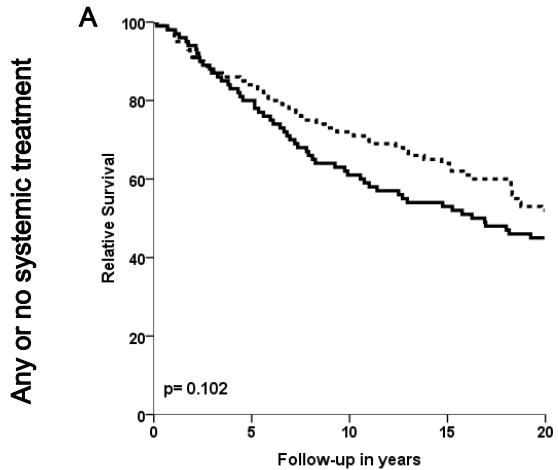

# at risk

|                 | 0   | 5   | 10  | 15 | 20 |
|-----------------|-----|-----|-----|----|----|
| ALDH-1 negative | 201 | 130 | 98  | 57 | 18 |
| ALDH-1 positive | 295 | 174 | 133 | 88 | 19 |

**< 65 years**

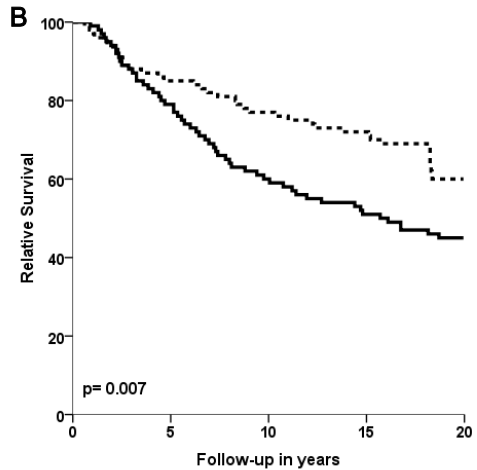

|                 | 0   | 5   | 10  | 15 | 20 |
|-----------------|-----|-----|-----|----|----|
| ALDH-1 negative | 113 | 84  | 73  | 48 | 17 |
| ALDH-1 positive | 213 | 123 | 102 | 70 | 17 |

**> 65 years**

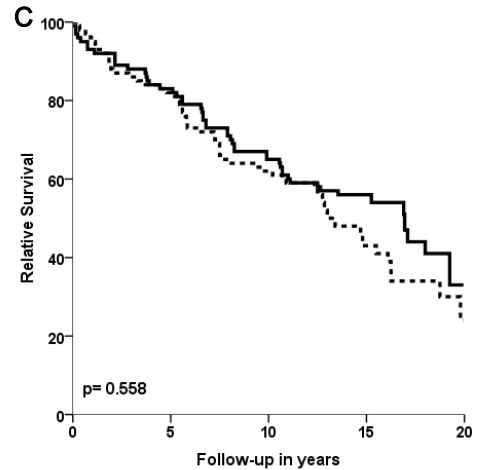

|                 | 0  | 5  | 10 | 15 | 20 |
|-----------------|----|----|----|----|----|
| ALDH-1 negative | 88 | 46 | 25 | 9  | 1  |
| ALDH-1 positive | 82 | 51 | 31 | 18 | 2  |

**No systemic treatment**

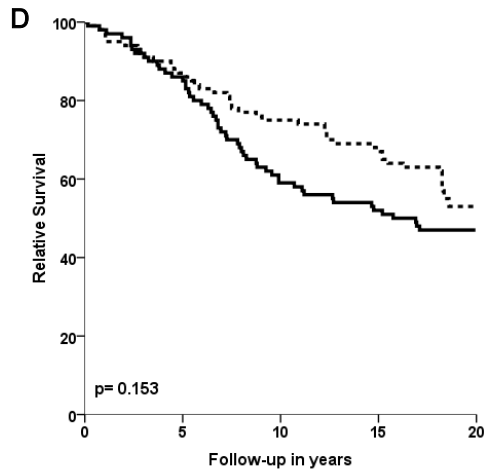

# at risk

|                 | 0   | 5   | 10 | 15 | 20 |
|-----------------|-----|-----|----|----|----|
| ALDH-1 negative | 140 | 93  | 71 | 39 | 14 |
| ALDH-1 positive | 177 | 106 | 77 | 53 | 14 |

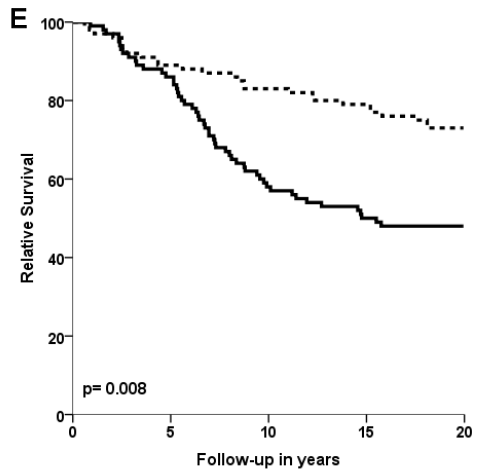

|                 | 0   | 5  | 10 | 15 | 20 |
|-----------------|-----|----|----|----|----|
| ALDH-1 negative | 77  | 60 | 53 | 34 | 13 |
| ALDH-1 positive | 116 | 67 | 55 | 39 | 12 |

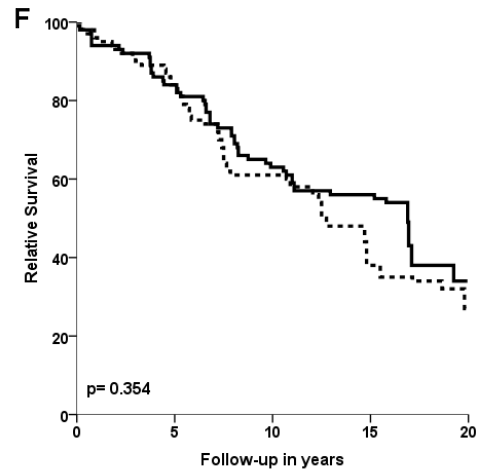

|                 | 0  | 5  | 10 | 15 | 20 |
|-----------------|----|----|----|----|----|
| ALDH-1 negative | 63 | 33 | 18 | 5  | 1  |
| ALDH-1 positive | 61 | 39 | 22 | 14 | 2  |
